# Supplementary material
Source: publisher site journal article supplement (https://www.dovepress.com/article/293635)
Supplement: Supplementary file 1 [file get_supplementary_file.php]

1. exp *Breast Neoplasms/su or exp Mastectomy/ or breast cancer surger*.ab. or mastectom*.ab. or lumpectom*.ab. or breast conserving surger*.ab.

2. Socioeconomic Factors/ or exp Educational Status/ or exp Social Class/ or Income/ or exp Economic Status/ or exp Occupations/ or Employment/ or Unemployment/ or Working Poor/ or Poverty/ or socioeconomic status.ti,ab. or socioeconomic position.ti,ab. or socioeconomic factors.ti,ab. or economic status.ti,ab. or occupation*.ti,ab. or social class.ti,ab. or unemploy*.ti,ab. or poverty.ti,ab. or working poor.ti,ab. or educational attainment.ti,ab. or educational status.ti,ab. or exp Information Literacy/ or exp Health Literacy/ or low* health literacy.ti,ab. or low* literacy.ti,ab. or Medically Uninsured/ or Medical Indigency/ or Medicaid/ or underinsured.ti,ab. or uninsured.ti,ab. or Homeless Persons/ or medicaid.ti,ab. or homeless*.ti,ab. or socioeconomic disparities.ti,ab.

3. 1 and 2
